# Supplementary material for: Molecular diagnosis of α-thalassemias by the colorimetric nanogold
Source: Royal Society of Chemistry journal article supplement (doi:10.1039/c3an01606d), 2013-11-11
Supplement: c3an01606d.pdf [file c3an01606d.pdf]

## Electronic Supplementary Information

### Molecular diagnosis of $\alpha$ -thalassemias by the colorimetric nanogold

Sirinart Chomean,<sup>a</sup> Nantawan Wangmaung,<sup>a</sup> Pornpimol Sritongkham,<sup>b</sup> Chamras Promptmas,<sup>c</sup>  
Sumana Mas-oodi,<sup>a</sup> Dalina Tanyong<sup>a</sup> and Wanida Ittarat<sup>a\*</sup>

<sup>a</sup>Clinical Microscopy, Faculty of Medical Technology, Mahidol University

<sup>b</sup>Biomedical Engineering, Faculty of Engineering, Mahidol University

<sup>c</sup>Clinical Chemistry, Faculty of Medical Technology, Mahidol University

\*To whom correspondence should be addressed

999 Putthamonthon Road, Salaya, Phutthamonthon, Nakhon Pathom, 73170, Thailand.

Fax: 66-2-441-4380

Tel: 66-2-441-4370-9 ext. 2726

Email: [wanida.itt@mahidol.ac.th](mailto:wanida.itt@mahidol.ac.th) or [creameo4@hotmail.com](mailto:creameo4@hotmail.com)

### 3.3. Preparation of the nanogold SEA-probe

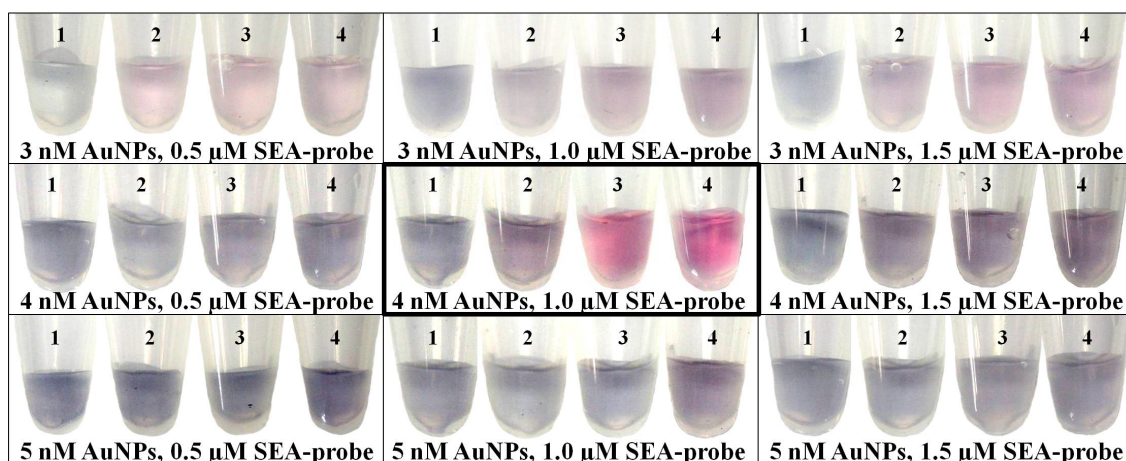

**Fig. S1** Color changes of the nanogold SEA-probe in diagnosis of normal  $\alpha$ -globin gene (2),  $\alpha$ -thalassemia 1 ( $--^{SEA}/\alpha\alpha$ ) carrier (3) and Hb Bart's hydrops fetalis (4) compared to control without DNA (1). The nanogold SEA-probe was prepared at various concentrations of AuNPs (3-5 nM) and SEA probe (0.5-1.5  $\mu$ M).

### 3.4. Investigation the optimal conditions of using the nanogold SEA-probe

#### 3.4.1 Assessment optimal volume ratio of target DNA and nanogold SEA-probe

(a)

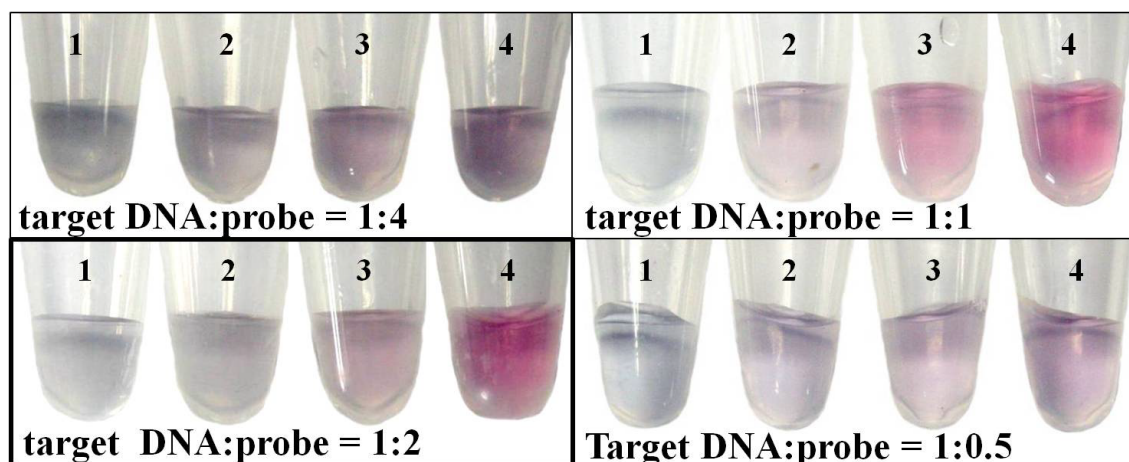

(b)

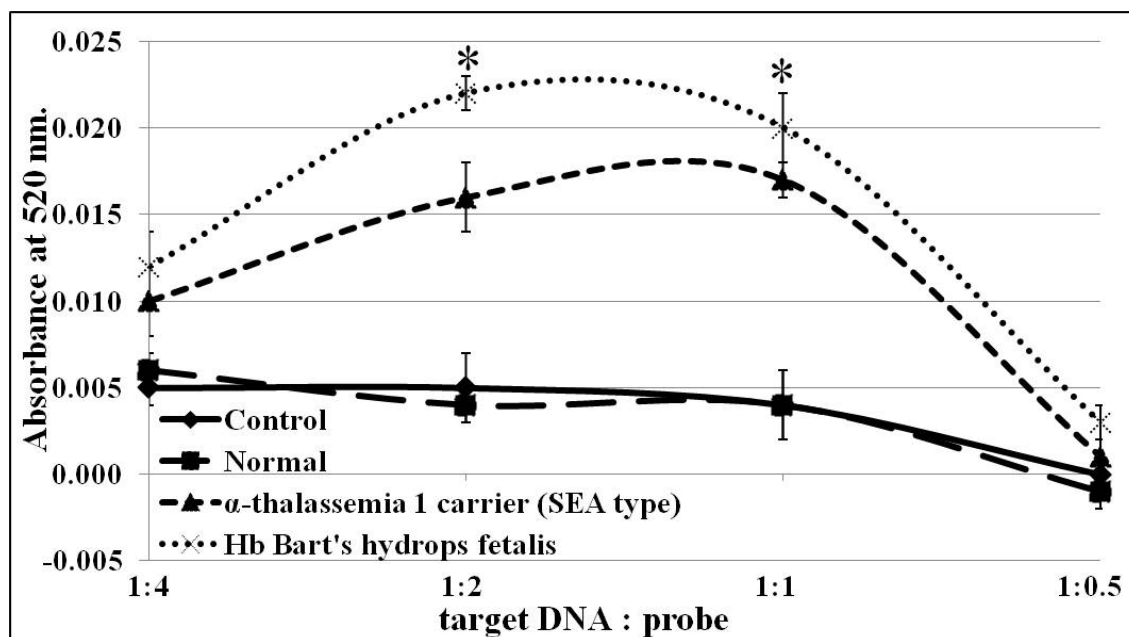

**Fig. S2** Hybridization of the amplified target DNA and the nanogold SEA-probe at various volume ratios. The color changed was visualized by naked eyes (a) and absorption at 520 nm (b). Blood carrying normal  $\alpha$ -globin gene (2) was identified from either  $\alpha$ -thalassemia 1 carrier ( $--^{SEA}/\alpha\alpha$ ) (3) or Hb Bart's hydrops fetalis (4) compared to control without target DNA (1). (\* indicated statistically significant difference at  $p$ -value < 0.05).

### 3.4.2. Assessment optimal Hybridization time

(a)

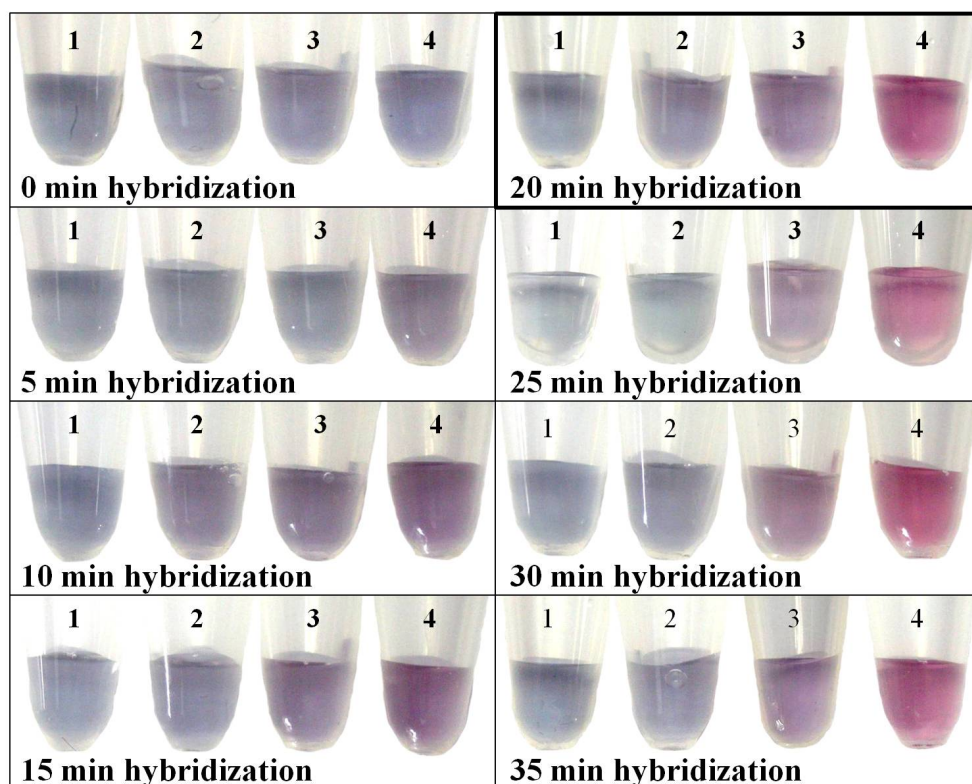

(b)

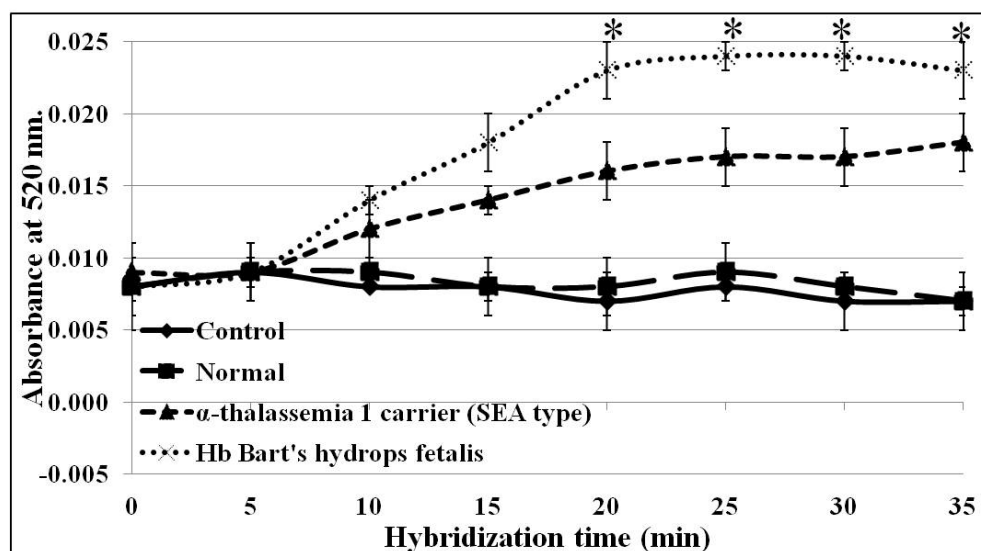

**Fig. S3** Hybridization of the amplified target DNA and the nanogold SEA-probe at various time intervals. The color changed was visualized by naked eyes (a) and absorption at 520 nm (b). Blood carrying normal  $\alpha$ -globin gene (2) was identified from either  $\alpha$ -thalassemia I carrier ( $--^{SEA}/\alpha\alpha$ ) (3) or Hb Bart's hydrops fetalis (4) compared to control without target DNA (1). (\* indicated statistically significant difference at  $p$ -value  $< 0.05$ ).

### 3.4.3. Assessment optimal salt concentration

(a)

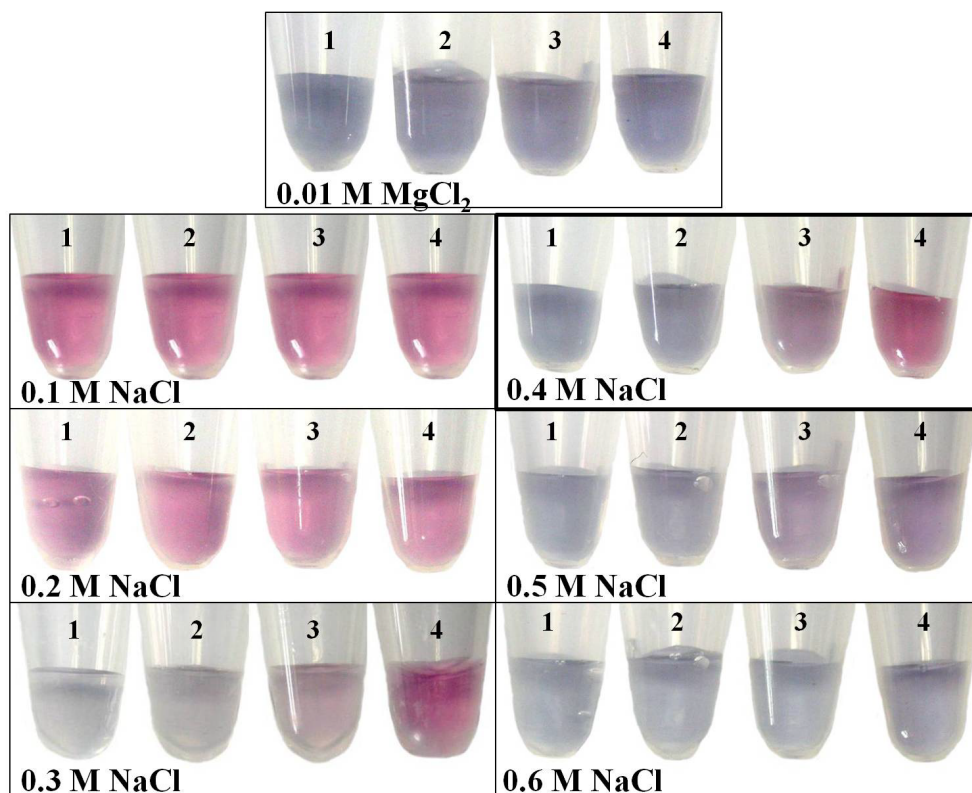

(b)

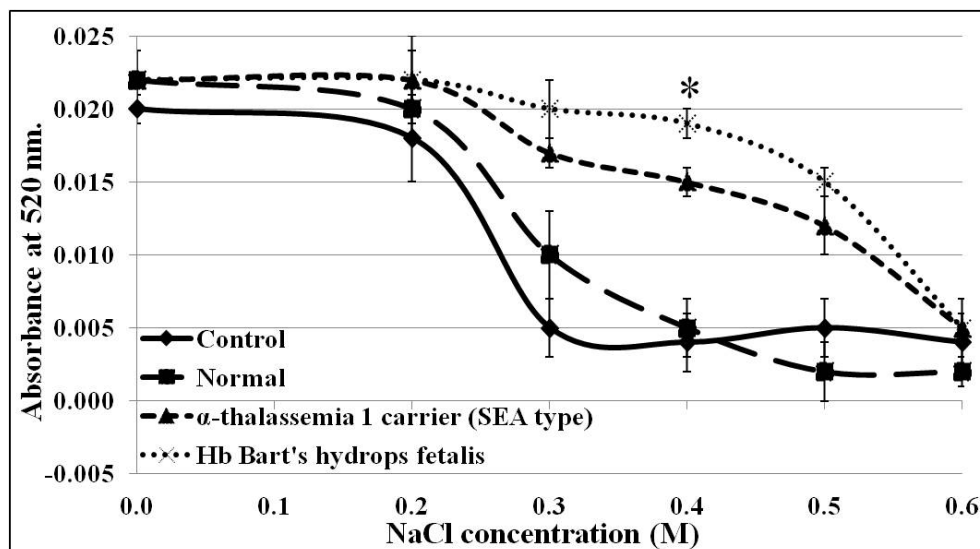

**Fig. S4** Effect of salt concentration on aggregation of the un-hybridized nanogold SEA-probe. The color changed was visualized by naked eyes (a) and absorption at 520 nm (b). Blood carrying normal  $\alpha$ -globin gene (2) was identified from either  $\alpha$ -thalassemia 1 carrier ( $SEA/\alpha\alpha$ ) (3) or Hb Bart's hydrops fetalis (4) compared to control without target DNA (1). (\*indicated statistically significant difference at  $p$ -value < 0.05).

### 3.4.4. Assessment stability of color after salt addition

(a)

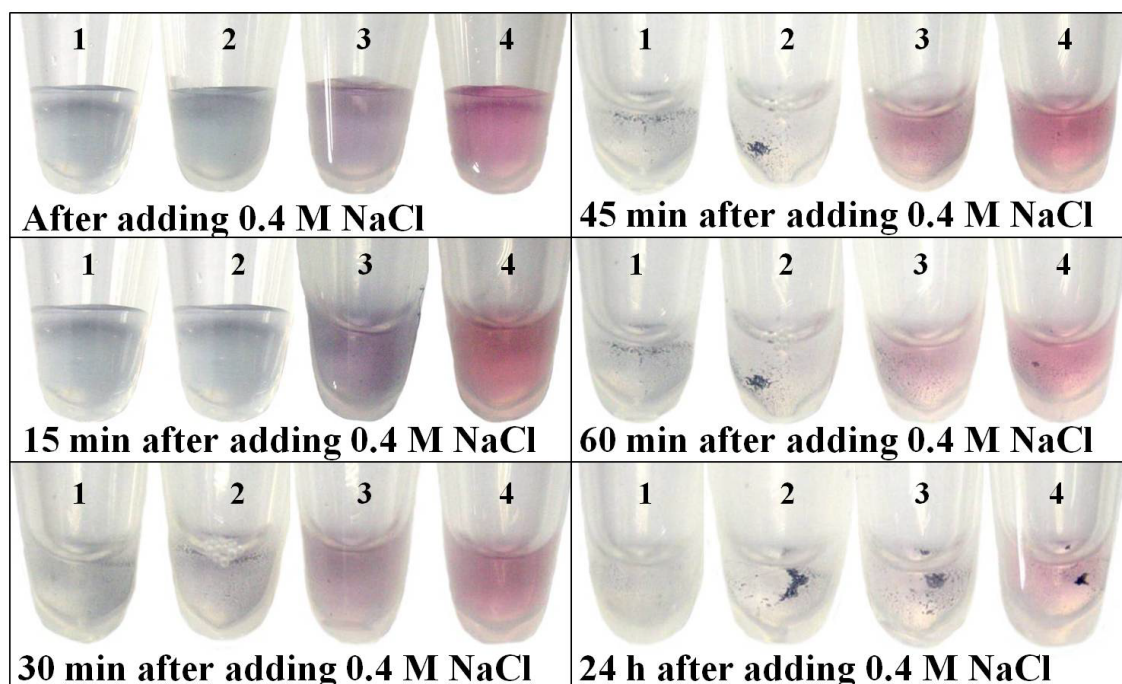

(b)

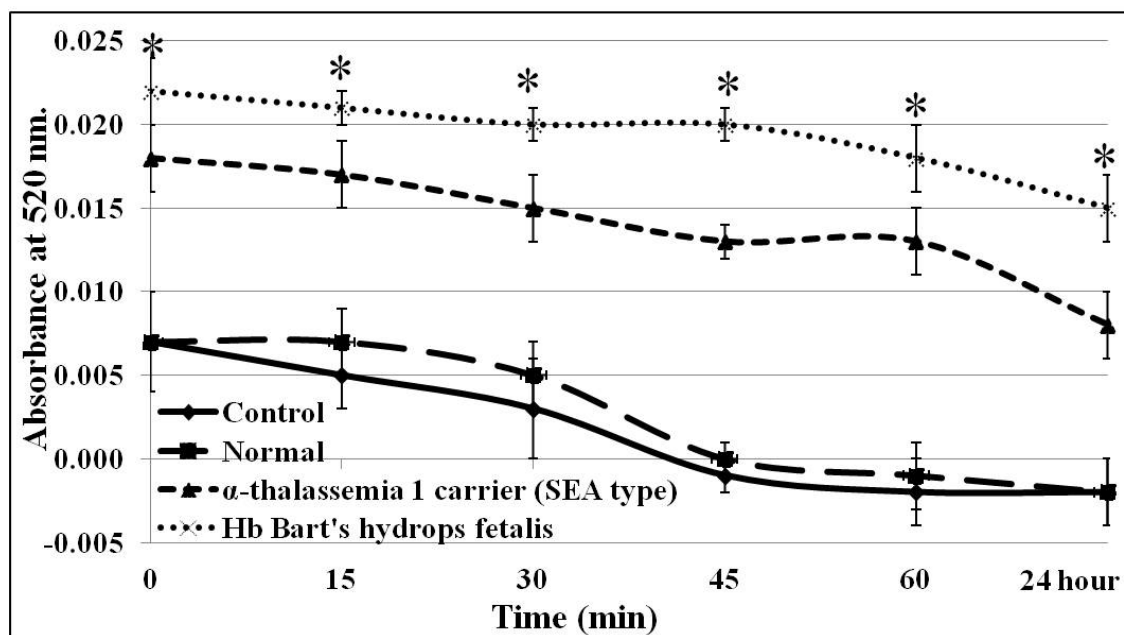

**Fig. S5** Stability of color changed after salt induced aggregation of the un-hybridized nanogold SEA-probe. The color changed was visualized by naked eyes (a) and absorption at 520 nm (b). Blood carrying normal  $\alpha$ -globin gene (2) was identified from either  $\alpha$ -thalassemia 1 carrier ( $--^{SEA}/\alpha\alpha$ ) (3) or Hb Bart's hydrops fetalis (4) compared to control without target DNA (1). (\*indicated statistically significant difference at  $p$ -value < 0.05).
